# Supplementary material for: Time-division multiplexing for myoelectric closed-loop control using electrotactile feedback
Source: PubMed Central journal article supplement (PMC4182789; doi:10.1186/1743-0003-11-138), 2014-09-15

## LEGEND

Component

Processing

Reference aperture  
*4 x opening/closing*

+

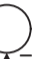

Tracking error

**Spatial coding  
error sign  
Intensity coding  
error amplitude**Stimulation parameters  
*Active electrode, current intensity***Electrotactile  
stimulator**Stimulation  
pulsesCurrent  
aperture

-

**Prosthesis  
model  
(Integrator)**Command input  
*velocity***Myoelectric  
control  
root mean square**EMG data  
*Recording windows*Time-division  
multiplexing (TDM)**EMG amplifier**Wrist/finger  
Flexion/extension**Subject**

CONTROL LOOP @1 kHz

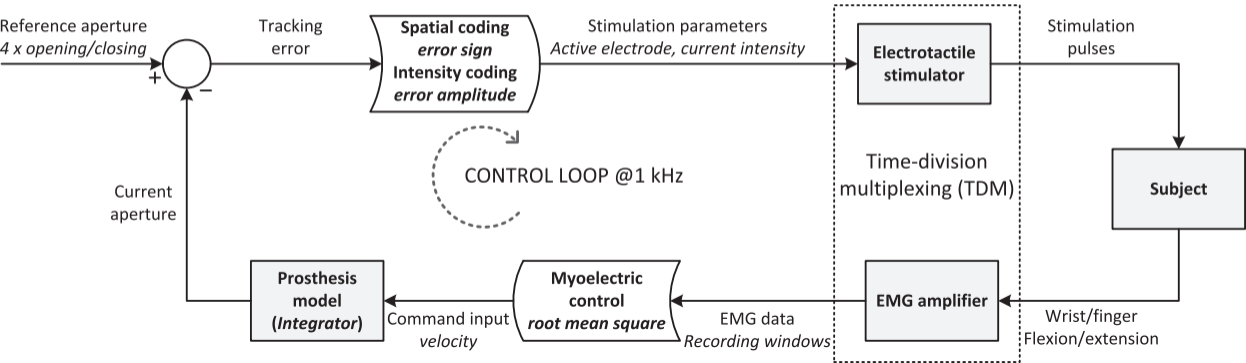

Supplement: 12984_2014_659_MOESM3_ESM.pdf [file 12984_2014_659_MOESM3_ESM.pdf]
