# Supplementary material for: Time-division multiplexing for myoelectric closed-loop control using electrotactile feedback
Source: PubMed Central journal article supplement (PMC4182789; doi:10.1186/1743-0003-11-138), 2014-09-15

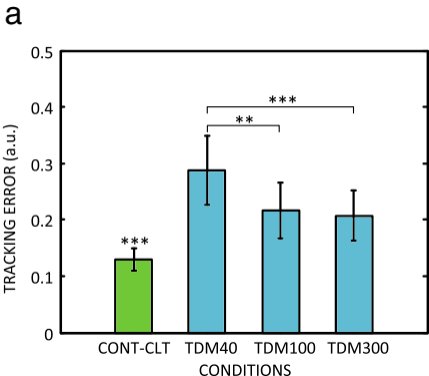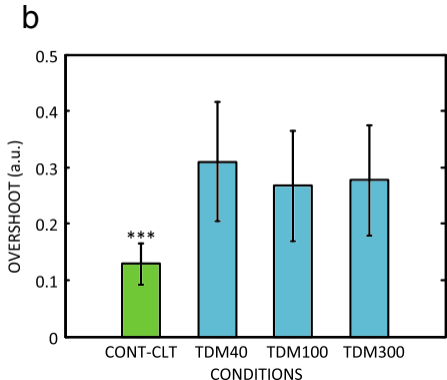

Supplement: 12984_2014_659_MOESM6_ESM.pdf [file 12984_2014_659_MOESM6_ESM.pdf]
